# Supplementary material for: DNA Methylation of FKBP5 as Predictor of Overall Survival in Malignant Pleural Mesothelioma
Source: PubMed Central journal article supplement (PMC7700347; doi:10.3390/cancers12113470), 2020-11-21
Supplement: cancers-12-03470-s001.pdf [file cancers-12-03470-s001.pdf]

Supplementary Materials

## DNA methylation of *FKBP5* as predictor of overall survival in Malignant Pleural Mesothelioma

Giovanni Cugliari, Chiara Catalano, Simonetta Guarrera, Alessandra Allione, Elisabetta Casalone, Alessia Russo, Federica Grosso, Daniela Ferrante, Clara Viberti, Anna Aspesi, Marika Sculco, Chiara Pirazzini, Roberta Libener, Dario Mirabelli, Corrado Magnan, Irma Dianzani, Giuseppe Matullo

*cg03546163*

TTTTTGTTTAGGATGAATTAGTTTGGAGAGGAAAGAATATTTTGTTTGTATATTTGT  
AGAAGAAGTTATTGTTGTTAAAAGTTAAGTTGGTTTTTTTGATGTTTAGTGTGGATAG  
GTTGAATAATAATTTATTTTTTACG(CpG1)TT**CG(CpG2)**GAGGGTTTATTTTATGTA  
AATAGTTGAAAGGAATTGGATAAGATTGTAGTTTTT

**Figure S1.** Locations of cg03546163 (CpG2, in bold) and a second CpG site very close (CpG1, in red), investigated by Sequenom MassARRAY. Flanking primers are underlined. The CpG sites could not be tested individually due to MassARRAY technology constraints, but had to be tested jointly as a single unit: the methylation level is the cumulative value of all the sites within the CpG unit.

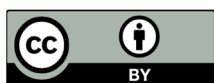

© 2020, by the authors. Licensee MDPI, Basel, Switzerland. This article is an open access article distributed under the terms and conditions of the Creative Commons Attribution (CC BY) license (<http://creativecommons.org/licenses/by/4.0/>).
